# Supplementary material for: A transgenic inducible GFP extracellular-vesicle reporter (TIGER) mouse illuminates neonatal cortical astrocytes as a source of immunomodulatory extracellular vesicles
Source: PubMed Central journal article supplement (PMC6395689; doi:10.1038/s41598-019-39679-0), 2019-02-28

## Supplementary Title Page

**Title:** A transgenic inducible GFP extracellular-vesicle reporter (TIGER) mouse illuminates neonatal cortical astrocytes as a source of immunomodulatory extracellular vesicles

Victoria N. Neckles<sup>1</sup>, Mary C. Morton<sup>1</sup>, Jennie C. Holmberg<sup>1</sup>, Aidan M. Sokolov<sup>1</sup>, Timothy Nottoli<sup>2</sup>, Don Liu<sup>3</sup>, David M. Feliciano<sup>1\*</sup>

1. Department of Biological Sciences, Clemson University, Clemson, SC 29634-0314, USA.

2. Yale Genome Editing Center, Department of Comparative Medicine, Yale School of Medicine, PO Box 208016, New Haven, CT 06520-8016, USA.

3. Charles River Laboratories, 251 Ballardvale Street, Wilmington, MA 01887

\*Lead Contact; To whom correspondence should be addressed: David M. Feliciano, Ph.D., Department of Biological Sciences, Clemson University, Clemson, SC 29634-0314, USA. Tel: 864.656.2328 FAX: 864.656.0435;

E-mail: [dfelici@clemson.edu](mailto:dfelici@clemson.edu)

## Supplemental Figure Legend

**Supplemental Figure 1. A.** Schematic diagram TIGER mouse prior to and after CRE mediated recombination. **B.** Neuro-2a cell transfected with CAG-tomato (red), CAG-CRE, and CD9-GFP (green) targeting plasmid and counterstained with TOPRO (blue). **C.** 5' ROSA26 targeting long range PCR assay. Black arrow indicates clones positive for 5' long range amplicon. **D.** 3' ROSA26 targeting long range PCR assay. Black arrow indicates clones positive for 3' long range amplicon. **E.** Founder mice generated litters with proper mendelian ratios and without defects. **F.** DNA gel of PCR using Turbo-GFP primer. **G.** DNA gel of Tomato and CRE PCR amplicons following crosses to generate appropriate genotypes.

**Supplemental Figure 2. A.** Schematic diagram of electroporation at P0. **B.** Image of CD9-GFP electroporated cells surrounding the SVZ. **C.** Tracing of the cells from B. accounting for tomato expression to illuminate the soma. **D.** Schematic of plasmid used for electroporation along with the mouse genotypes for E. **E-G.** 5, 10, and 20x zoom-2 coronal sections at P2 following electroporation of CRE and counterstained with TOPRO (blue). Note recombination demonstrated by tomato (red) and the subcellular localization of CD9-GFP (green) surrounding tomato positive cells.

**Supplemental Figure 3. A.** Schematic diagram of genotypes of cross between TIGER mice, tomato mice, and nestin-CRE-ER<sup>T2</sup> mice. **B, C.** CD9-GFP (green) and tomato (red) expression following tamoxifen injection and subsequent expression within the RMS-OB at 5x (B) and 20x (C). **D, E.** CD9-GFP (green) and tomato (red) expression following tamoxifen injection and subsequent expression within the cerebral cortex at 5x (D) and 20x (E). **F, G.** CD9-GFP (green) and tomato (red) expression following tamoxifen injection and subsequent expression within the Hippocampus at 5x (F) and 20x (G). **H, I.** CD9-GFP (green) and tomato (red) expression

following tamoxifen injection and subsequent expression within the cerebellum at 5x (H) and 10x (I).

**Supplemental Western Blots.** Uncropped western blots

Supplemental Figure 1

A

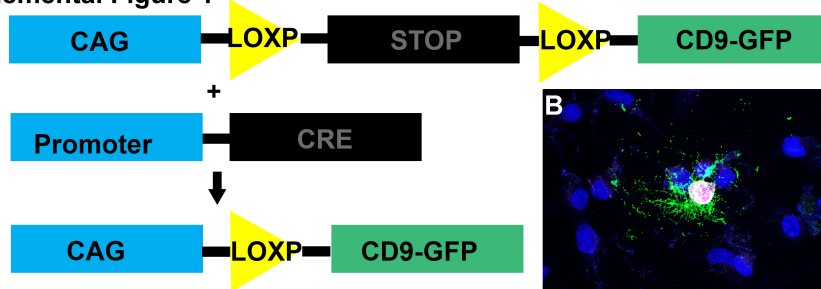

B

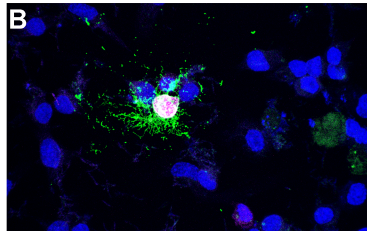

E

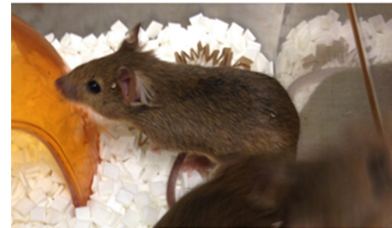

C

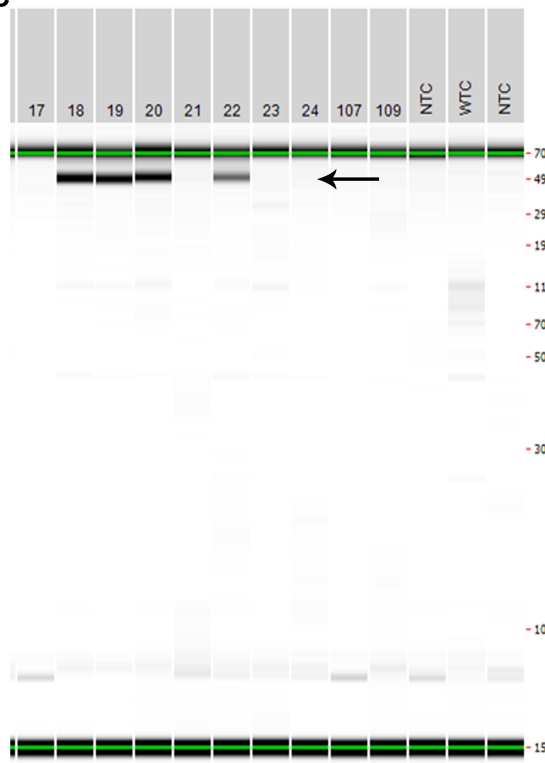

D

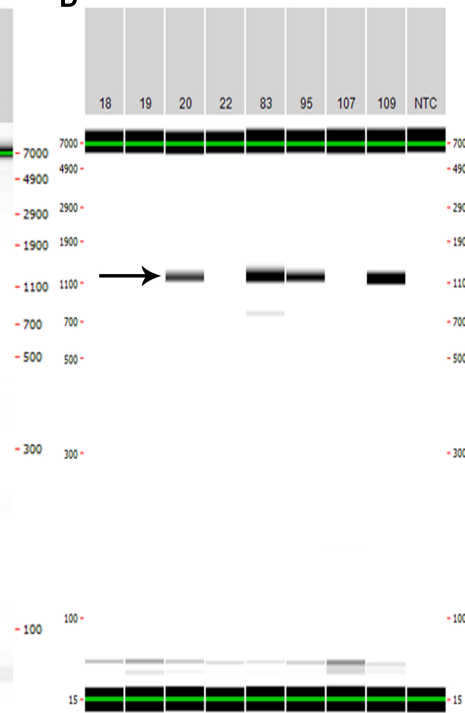

F

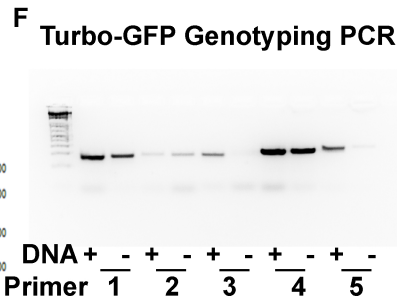

G

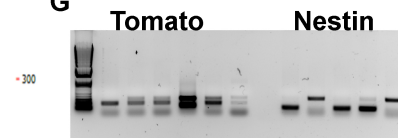

Supplemental Figure 2

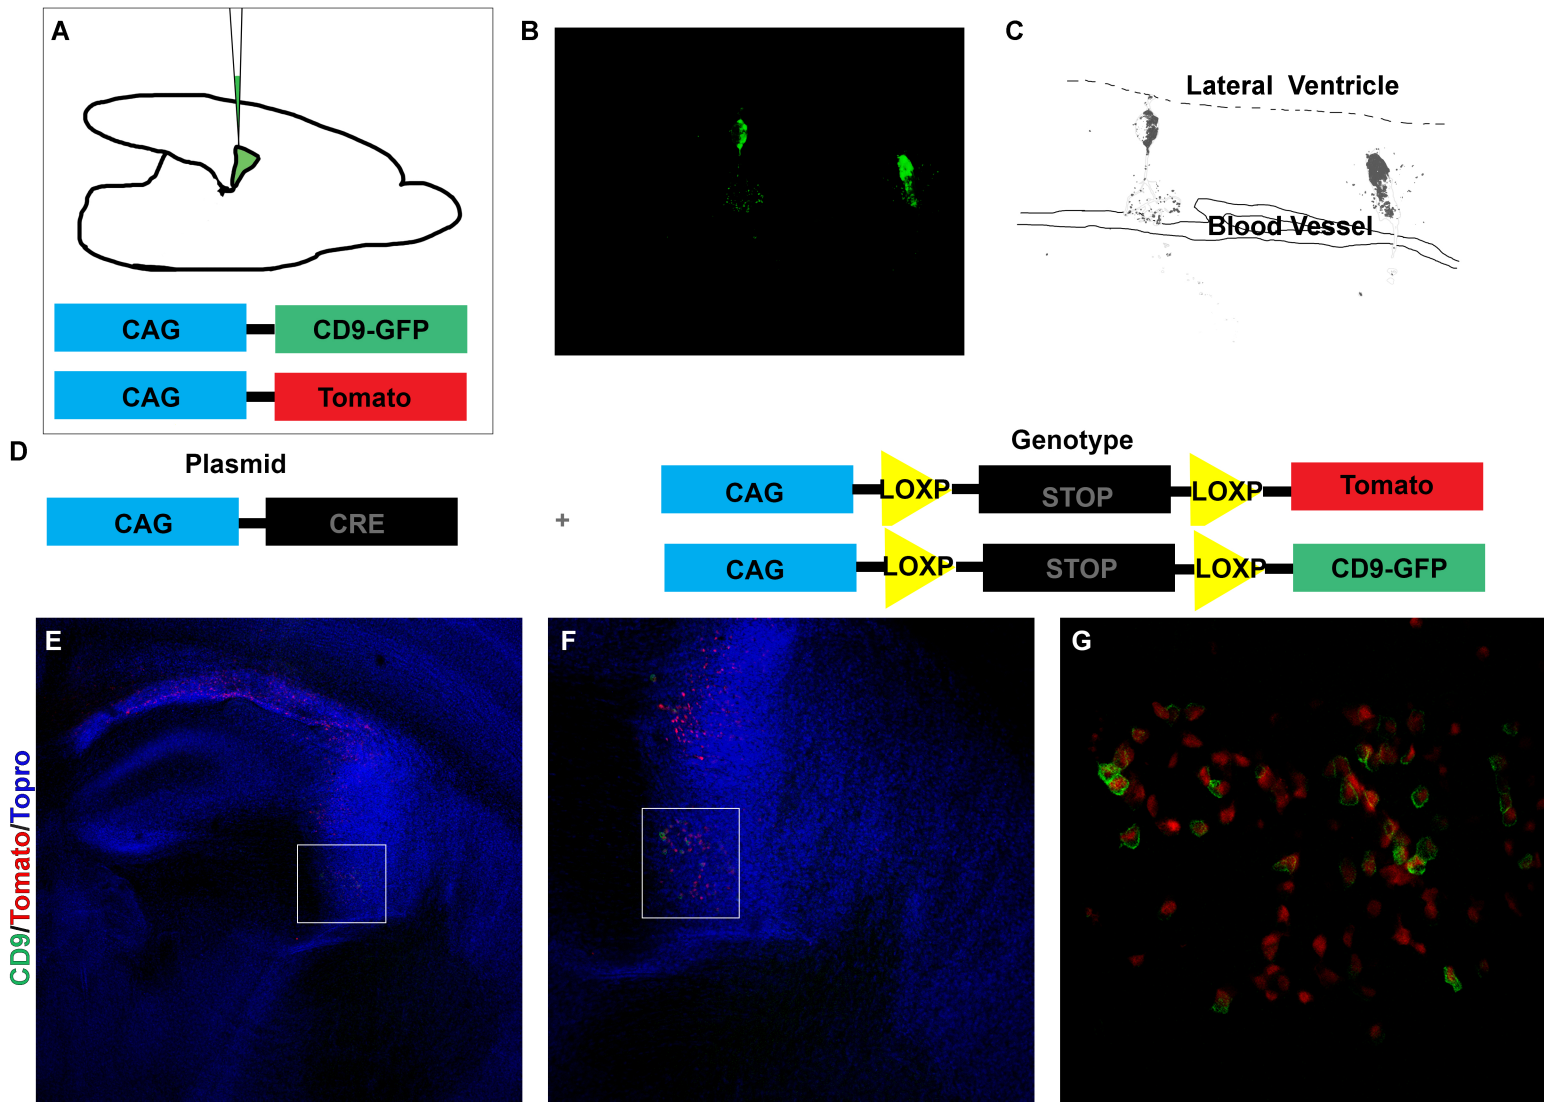

Supplemental Figure 3

A

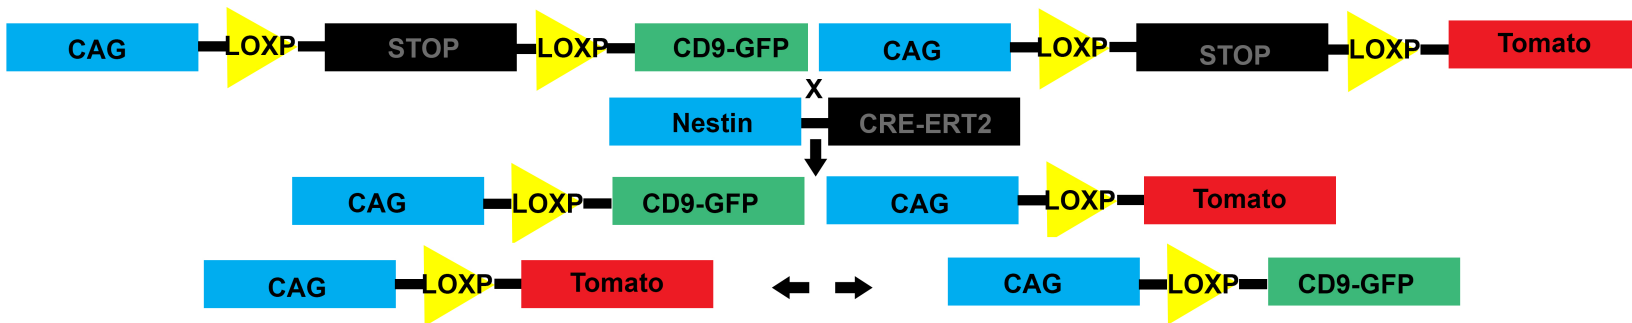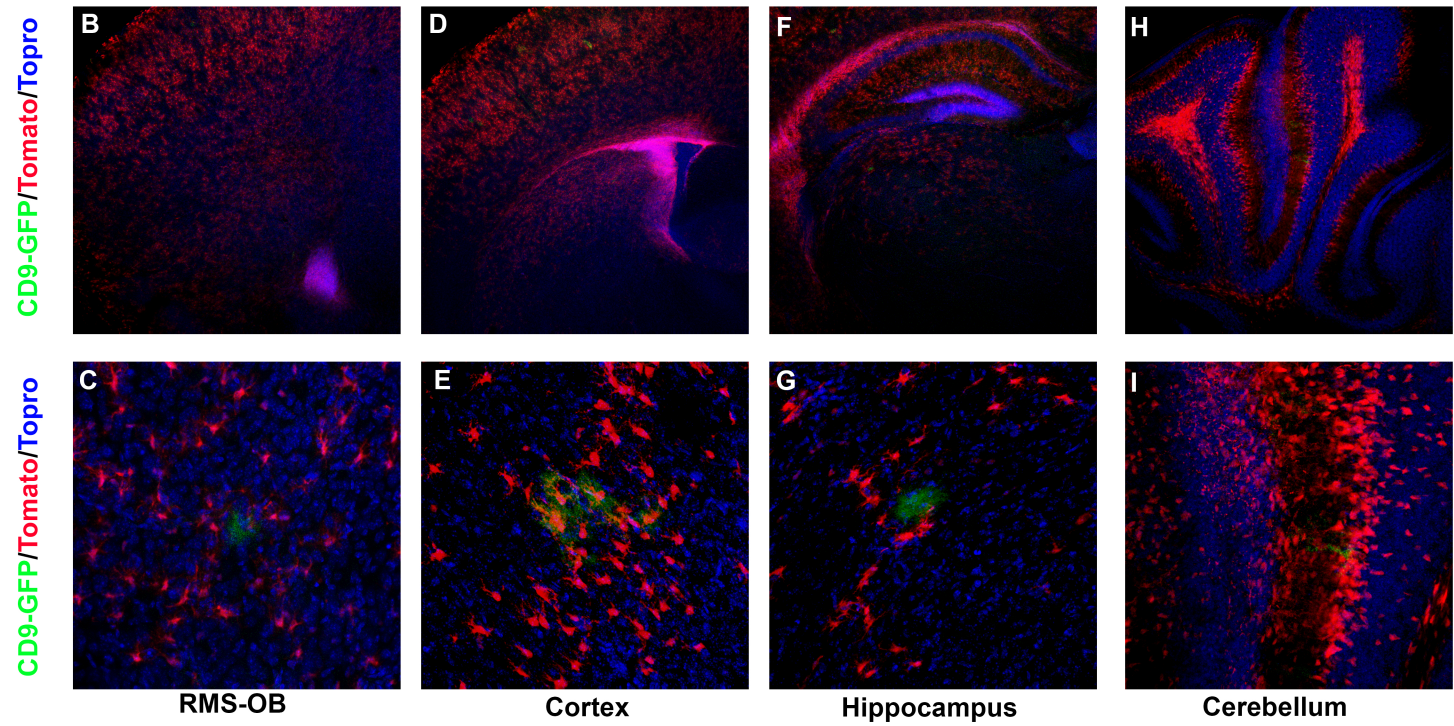

Supplemental Westerns

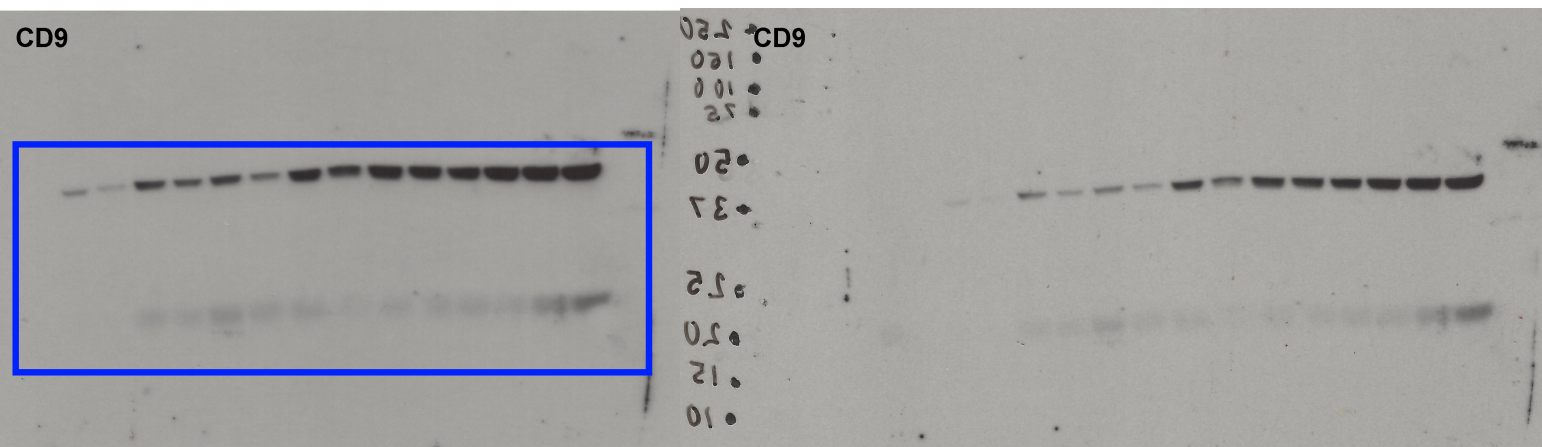

Long Exposure

Short Exposure

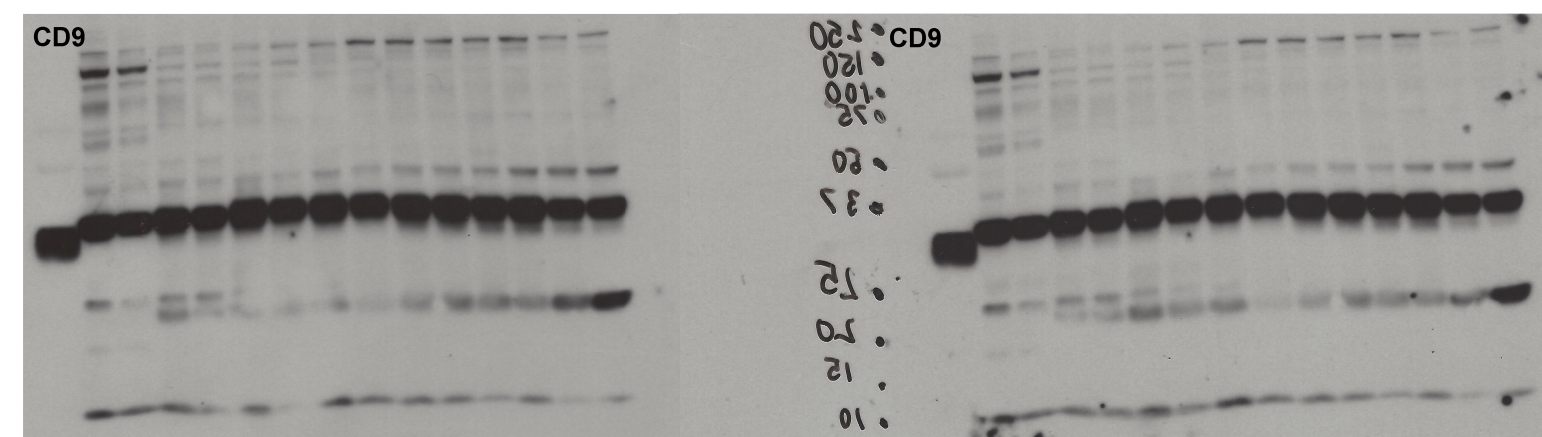

Long Exposure

Short Exposure

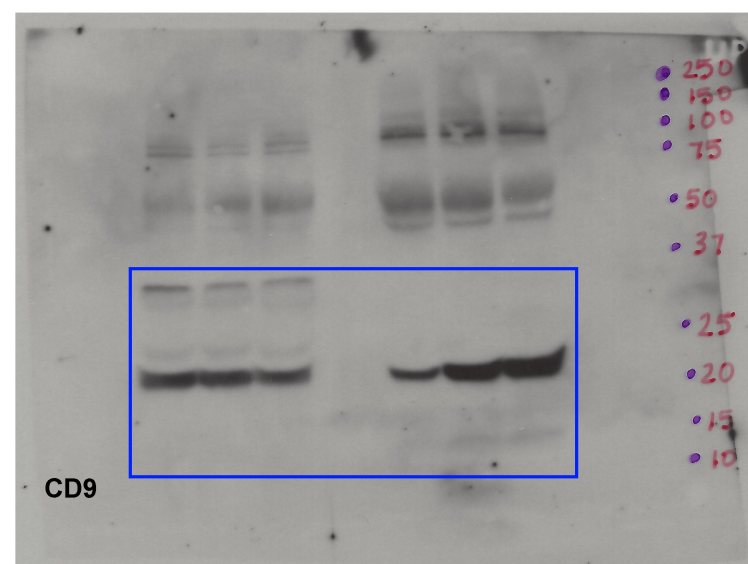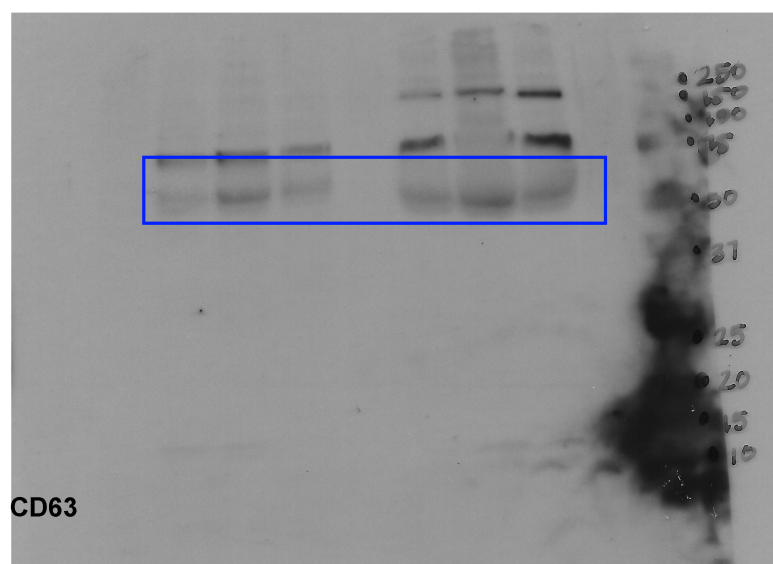

Supplement: 41598_2019_39679_MOESM1_ESM.pdf [file 41598_2019_39679_MOESM1_ESM.pdf]
